# Supplementary material for: PyRanges: efficient comparison of genomic intervals in Python
Source: Oxford University Press journal article supplement (doi:10.1093/bioinformatics/btz615), 2019-08-01
Supplement: bioinformatics_36_3_918_s2.zip [file bioinformatics_36_3_918_s2.zip]

Archive with 2 entries (2 files):
- media-2 (1).pdf
- media-1 (1).pdf
